# Supplementary material for: Hypoxia induces an early primitive streak signature, enhancing spontaneous elongation and lineage representation in gastruloids
Source: PubMed Central journal article supplement (PMC9578691; doi:10.1242/dev.200679), 2022-09-14
Supplement: develop-149-200679-s1.pdf [file develop-149-200679-s1.pdf]

Figure S1

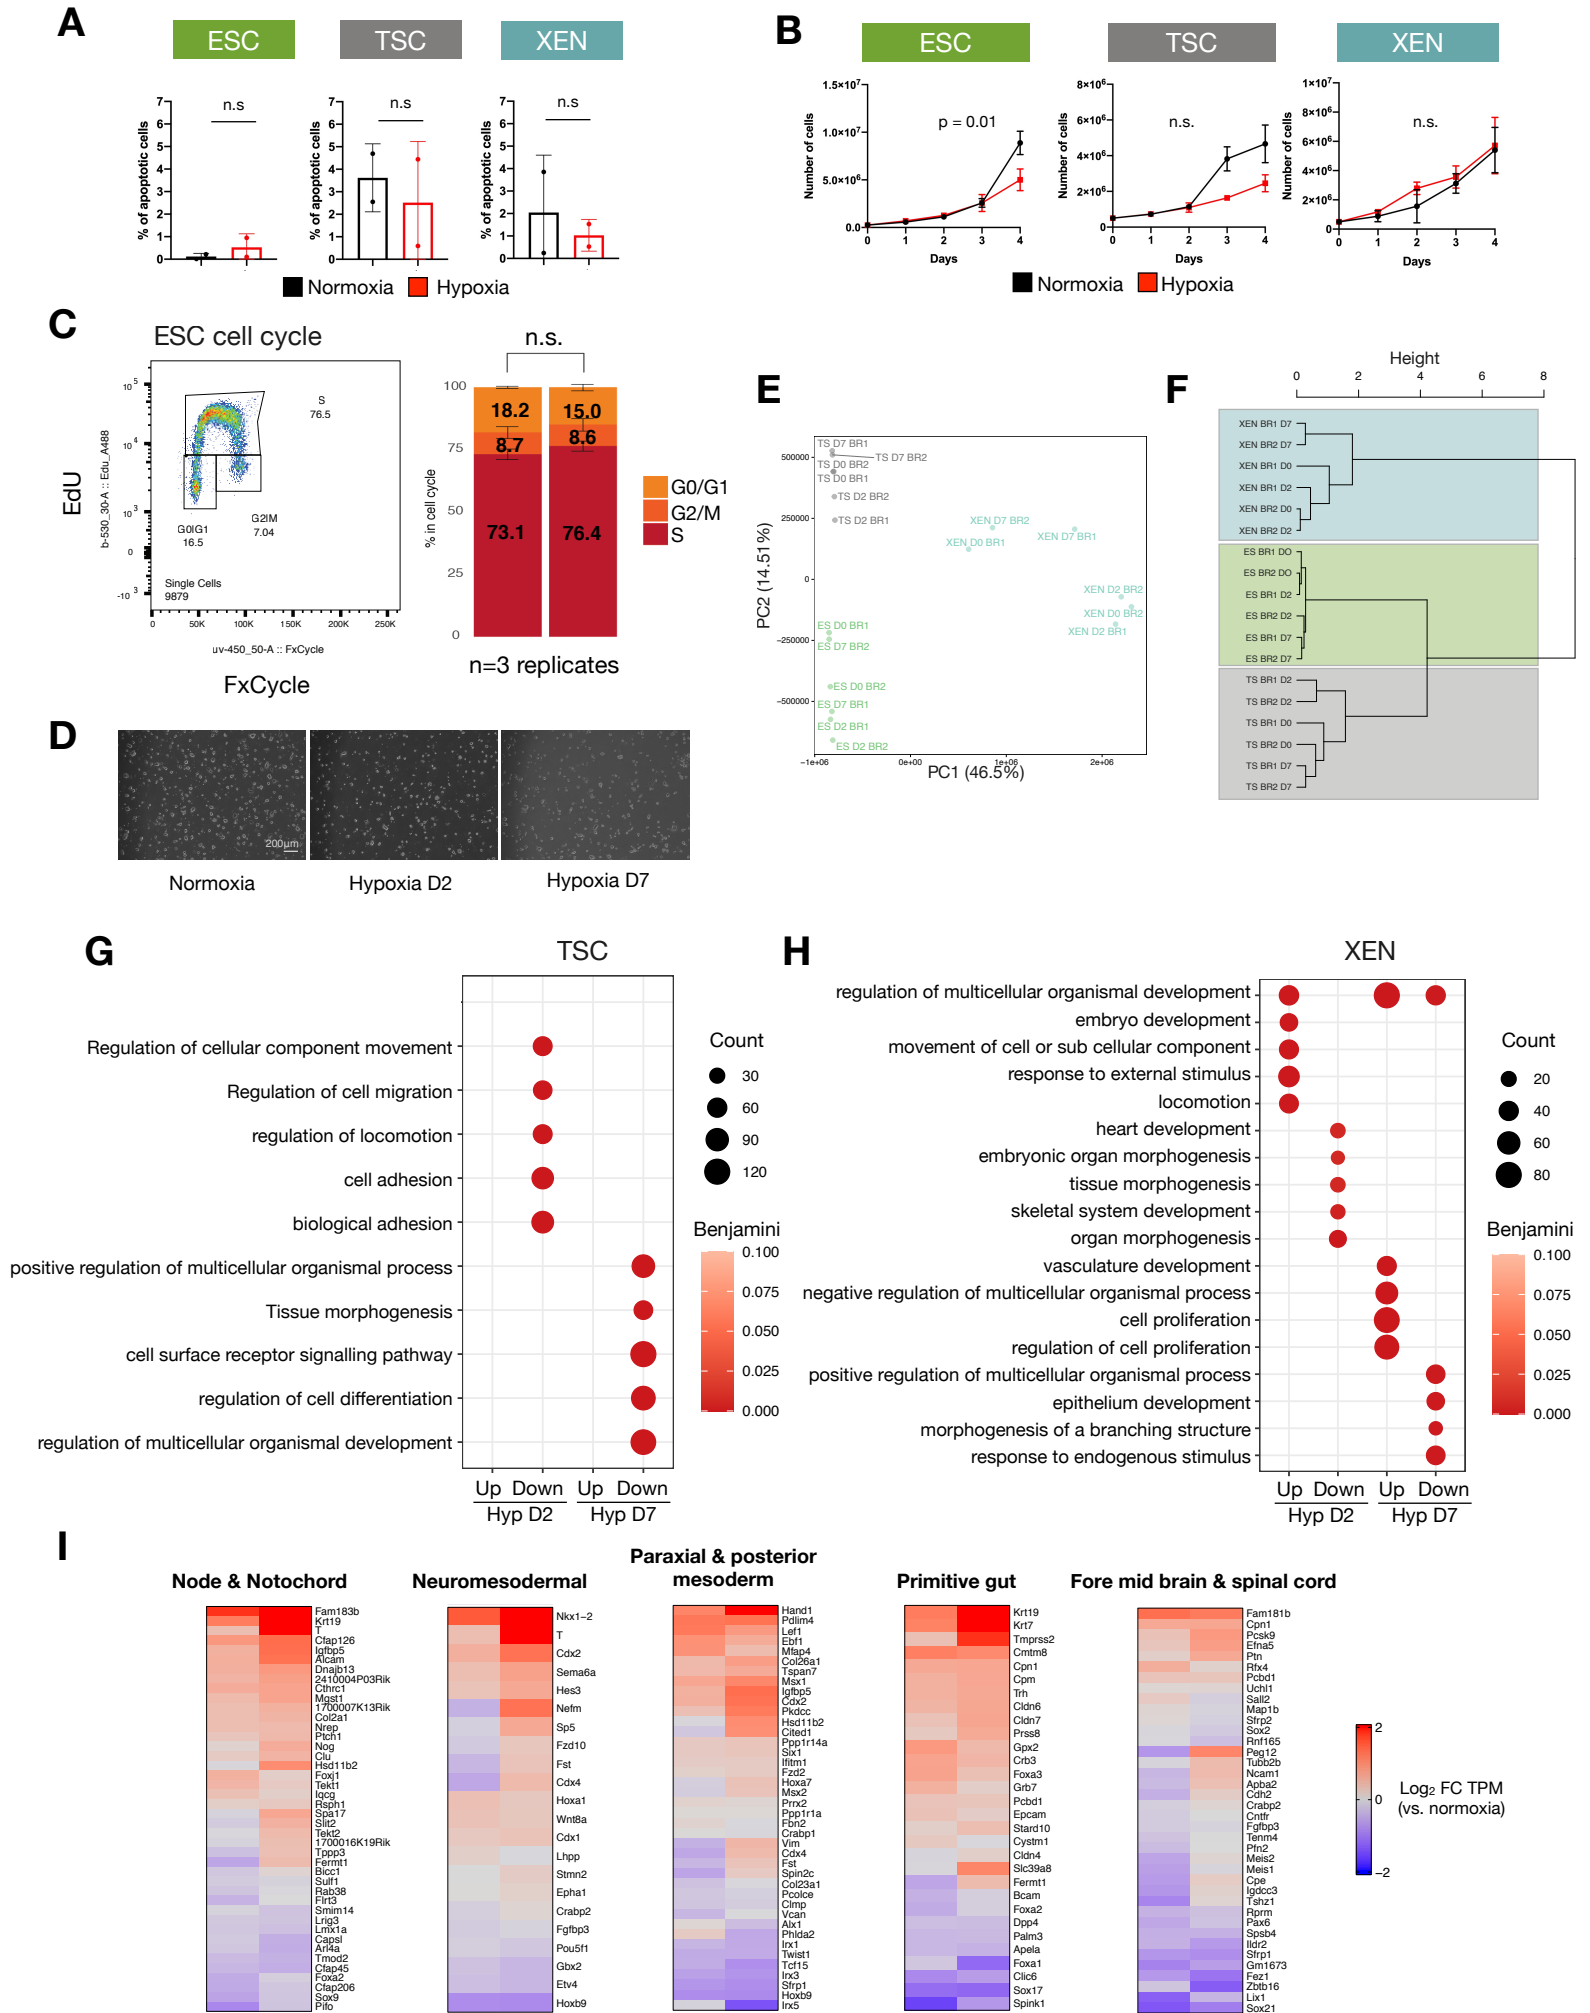

**Fig. S1. Further characterization of the hypoxic response in stem cells.**

- A) Apoptosis levels of normoxic or hypoxic (d7) ES, TS, and XEN cells, defined as Casp3/7<sup>+</sup> and Sytox<sup>-</sup>. See methods for more details. Two biological replicates were performed. Two-tailed paired Student's t-test was applied.
- B) Growth curves of ES, TS, and XEN cells grow in normoxia or hypoxia. same number of cells were seeded in both conditions and cells were counted daily. Two biological replicates were performed. The statistical test performed is a two-tailed paired Student's t-test.
- C) Analysis of cell cycle phase distribution of normoxic or hypoxic (d7) ESCs. Cells were pulse-labeled with EdU, and EdU vs FxCycle Violet (DNA stain) amounts were measured by flow cytometry. A representative readout (left) and cell cycle distributions (right) are shown. n.s.=non-significant.
- D) Bright-field pictures of ESC colonies on the day of collection for bulk RNA-seq.
- E, F) Principal component analysis (PCA) (E) and hierarchical clustering (F) based on global transcriptomes.
- G, H) GO-BP terms associated with DE genes in TS (G) and XEN (H) cells exposed to acute (d2) or prolonged (d7) hypoxia. Representative significant terms are shown. No significant terms were retrieved for upregulated genes in TS cells on day 2 of hypoxia.
- I) Heatmaps showing expression levels of the indicated genes in hypoxic relative to normoxic ESCs. See Methods for details.



Figure S2

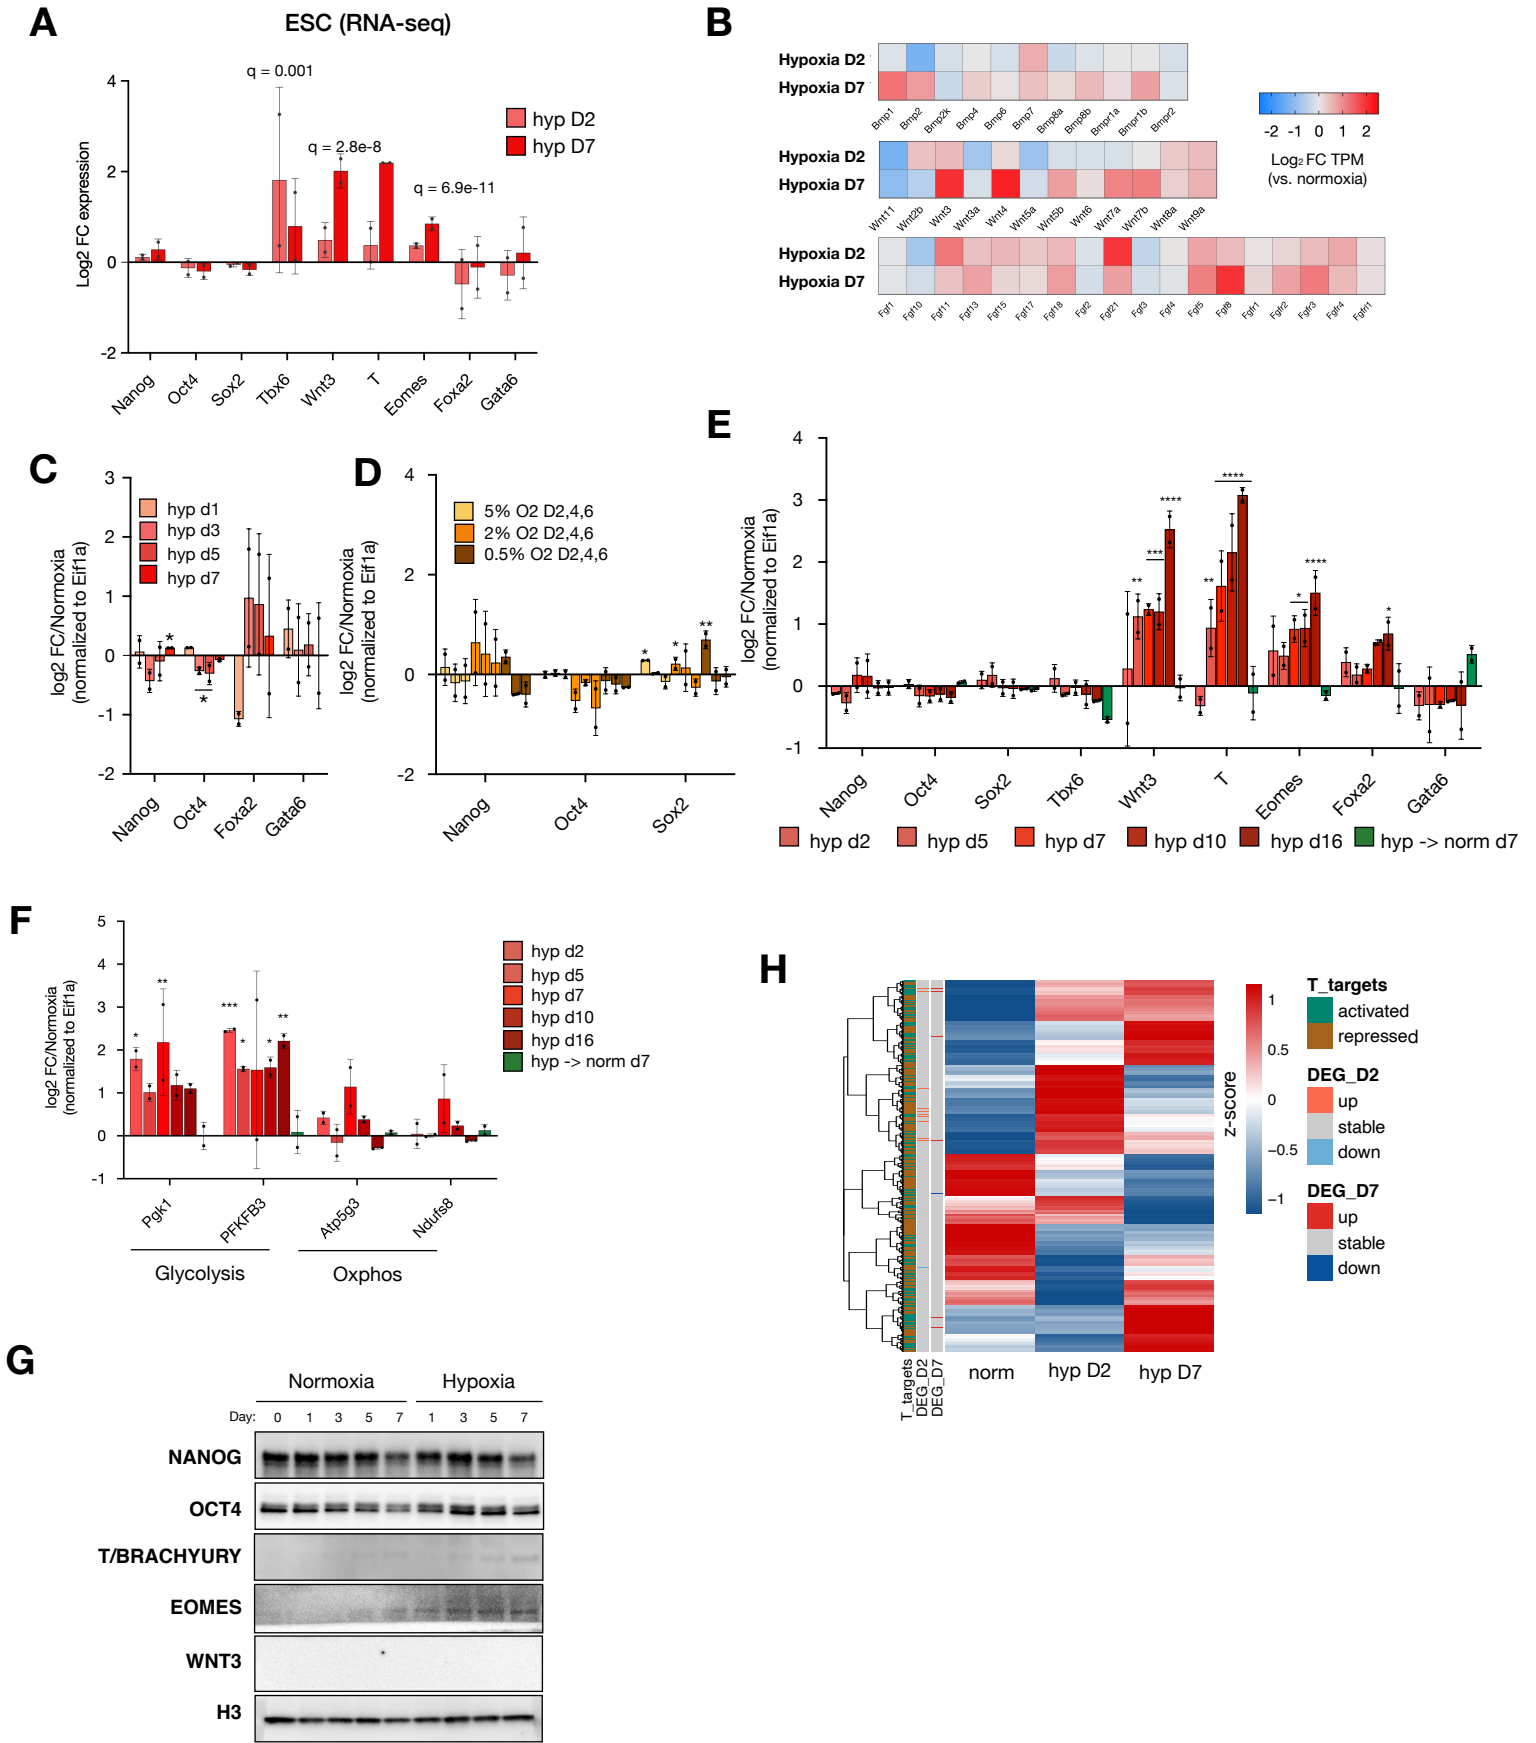

**Fig. S2. Further characterization of pluripotency and differentiation-associated gene activity.**

- A) Expression levels of shown genes measured by RNA-seq. Data represent  $\log_2FC$  over normoxic ESCs of TMP expression values and standard deviation.
- B) Heatmaps showing expression levels of Bmp, Wnt, and Fgf, genes in hypoxic relative to normoxic ESCs.
- C-F) RT-qPCR analysis of shown genes in hypoxic ESCs. Statistical test is two-way ANOVA.
- G) Western blot showing expression levels of the indicated genes in normoxic and hypoxic ESCs. H3 was used as a loading control.
- H) Heatmap showing expression levels of T target genes in normoxic and hypoxic ESCs. T target genes were identified as described in the Methods. Bar annotations show, 1) T\_targets; T -activated (in green) and -repressed (in brown) target genes in *in vitro* primitive streak differentiated cells, 2) DEG in hypoxia day 2 (D2) and day 7 (D7); up- (in red), down- (in blue) regulated and stable (in gray) genes on hypoxia day 2 and/or day 7.

Figure S3

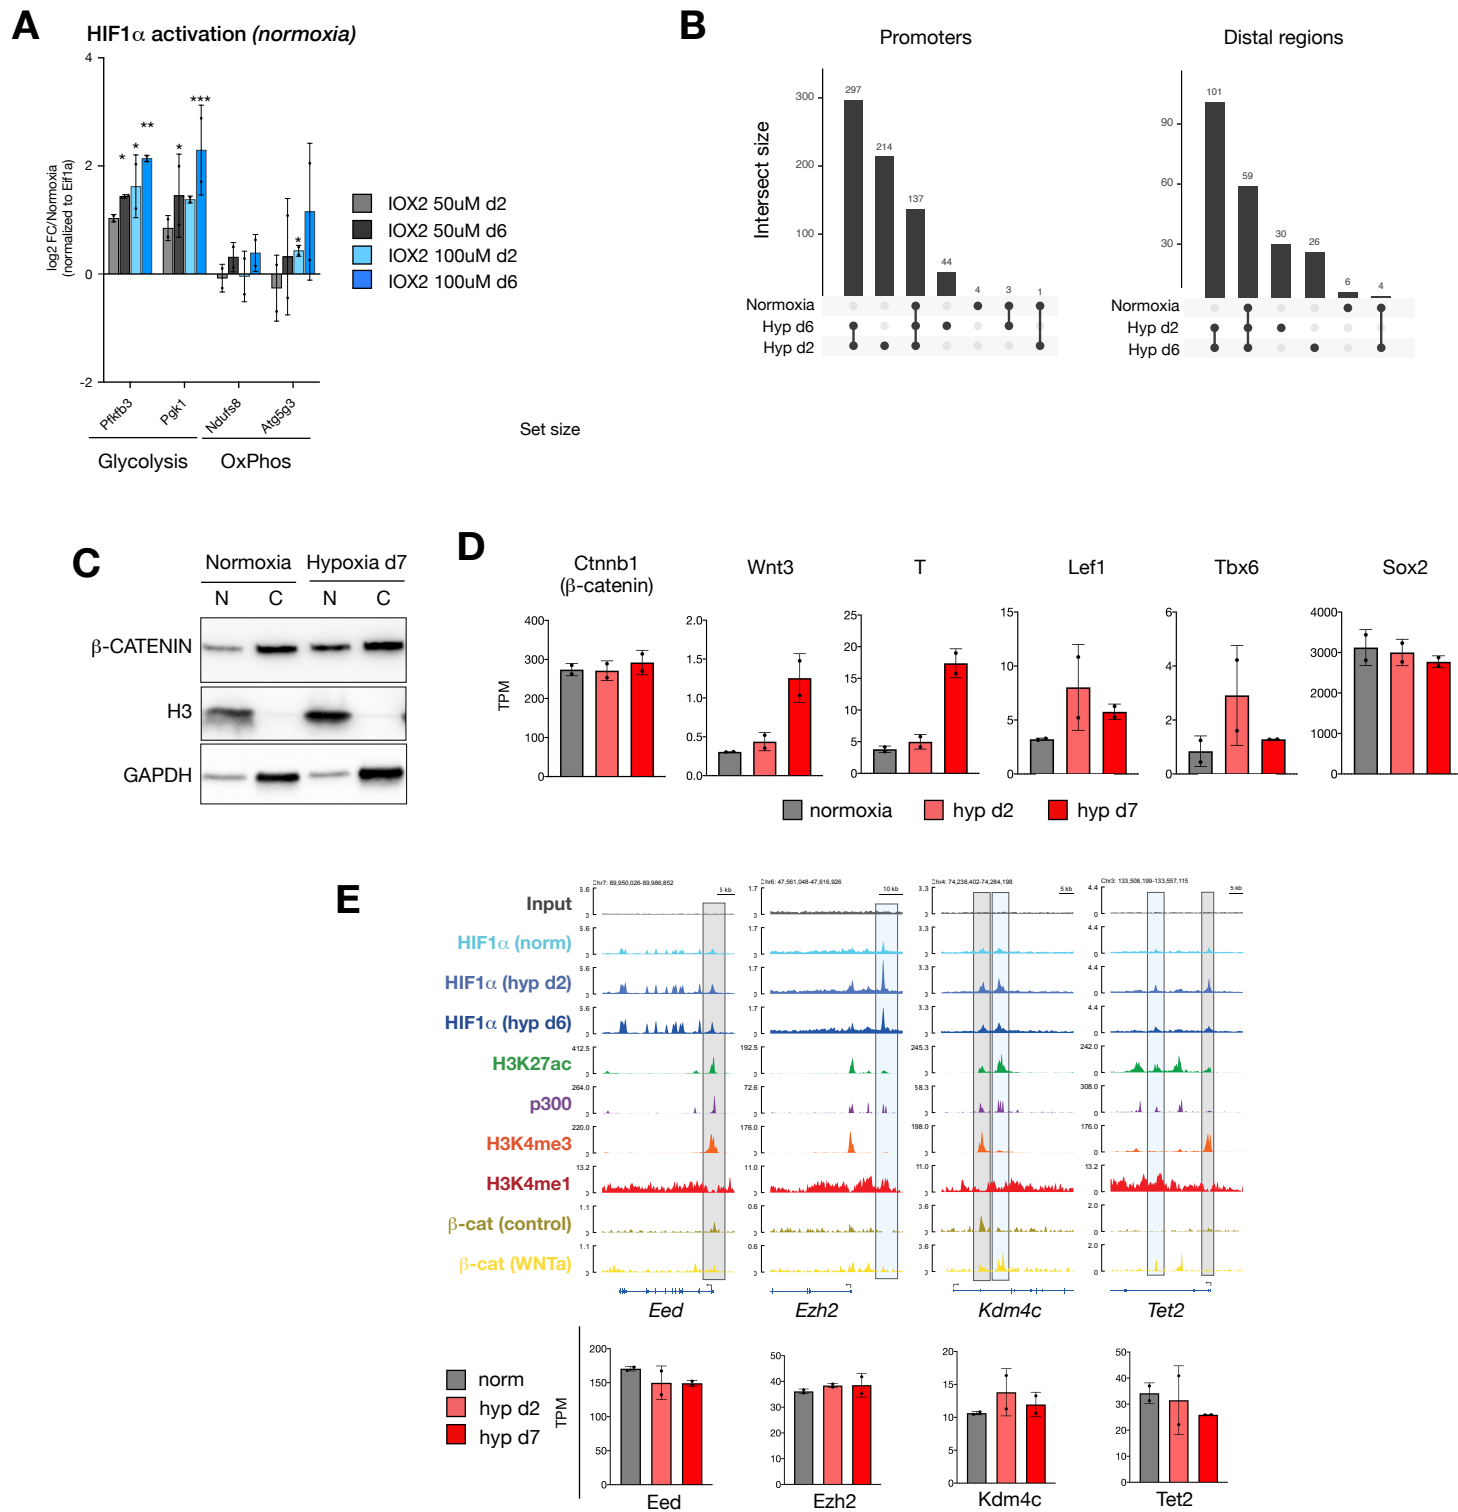

**Fig. S3. Further characterization of Hif1 $\alpha$  activity at chromatin.**

- A) RT-qPCR analysis of shown genes in ESCs treated with the HIF1 $\alpha$  activator IOX2 at indicated concentrations in normoxia. Data represent log<sub>2</sub>FC over DMSO-treated ESCs. Statistical test is two-way ANOVA.
- B) Overlap of HIF1 $\alpha$ -bound promoters (left) and distal sites (right) in normoxic and hypoxic ESCs.
- C) Protein expression levels and subcellular localization of  $\beta$ -CATENIN in normoxic and hypoxic (d7) ESCs. Histone H3 is used as loading control. H3 and GAPDH were used as loading and fractionation controls. N, nuclear fraction. C, cytoplasmic fraction.
- D) TPM expression values of the shown genes in normoxic and hypoxic ESCs as measured by RNA-seq are plotted as bar plots.
- E) Genome browser views of HIF1 $\alpha$  chromatin occupancy and histone modifications at epigenetic regulators (top). Expression values of the shown genes in normoxic and hypoxic ESCs as measured by RNA-seq are plotted as bar plots (bottom). Gray and blue highlights indicate promoter and ES active enhancers, respectively.

Figure S4

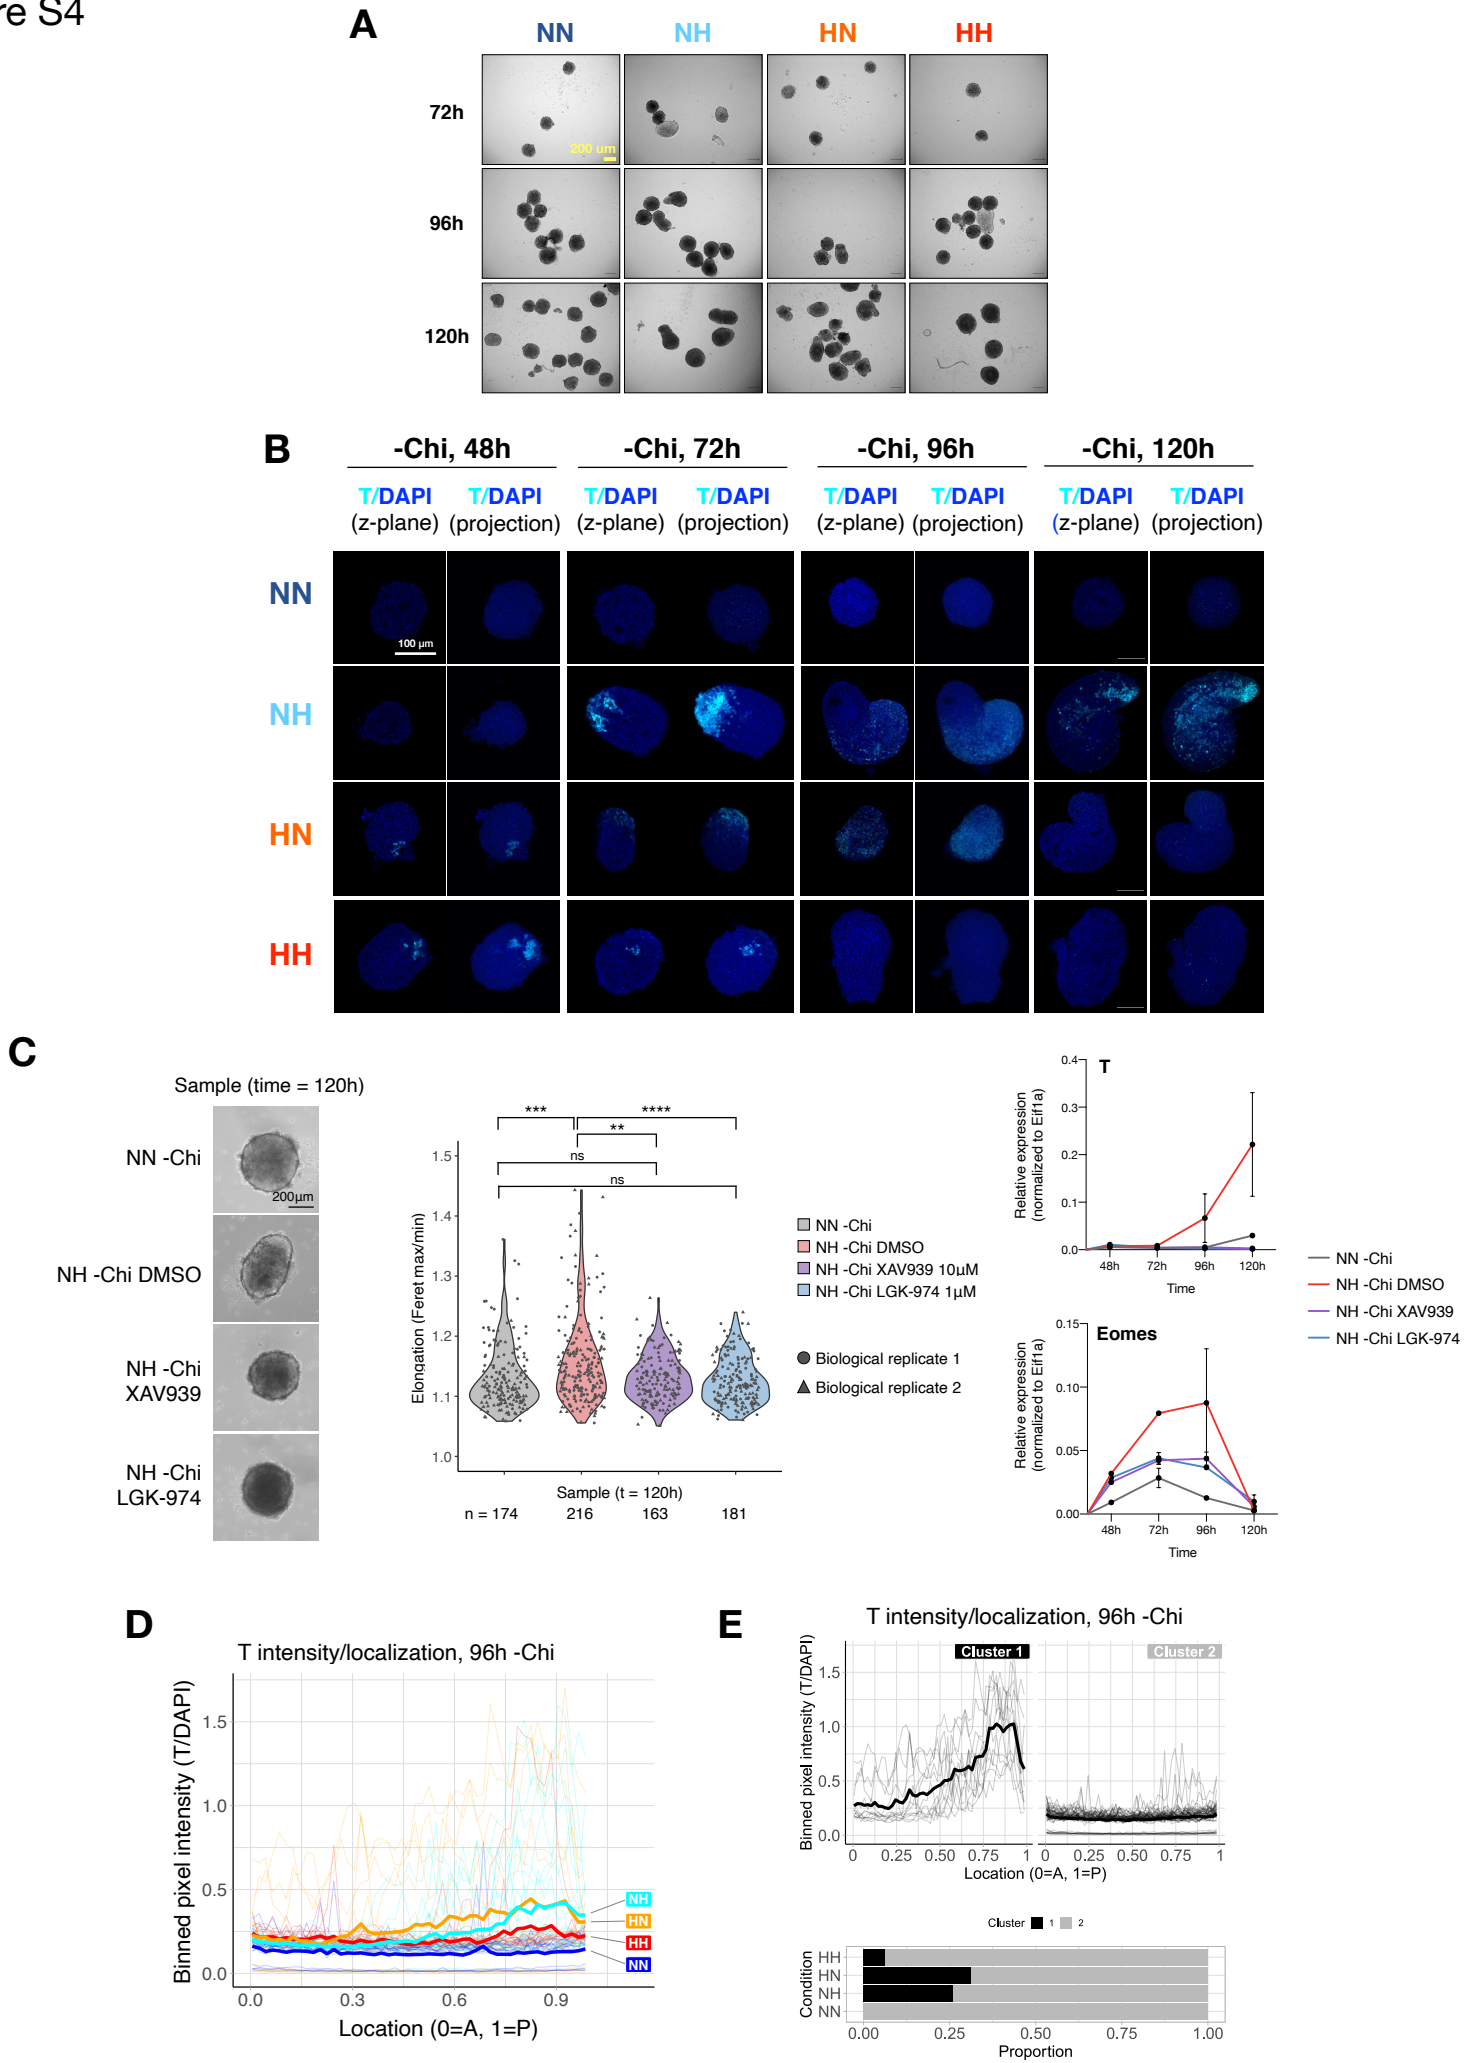

**Fig. S4. Characterization of spontaneously elongating hypoxic gastruloids.**

- A) Bright-field images of representative gastruloids at the indicated time points.
- B) Confocal fluorescent microscopy images of representative -Chi gastruloids at indicated time points of culture.
- C) WNT inhibitor treatment of NH- Chi gastruloids. Bright-field images of representative gastruloids at 120h at the indicated conditions (left), elongation index (middle), and relative expression levels of T and Eomes (right) are shown. Data represent two biological replicates.
- D) K-means clustering of the NH and HN structures presented in C) with n=2 clusters.
- E) Localization of T signal along the anterior-posterior (A-P) axis of gastruloids in each condition at 96h of culture. T signal normalized to DAPI and binned at 1% length increments along each structure for plotting. Thick lines show mean values and thin lines show data from individual structures.



Figure S5

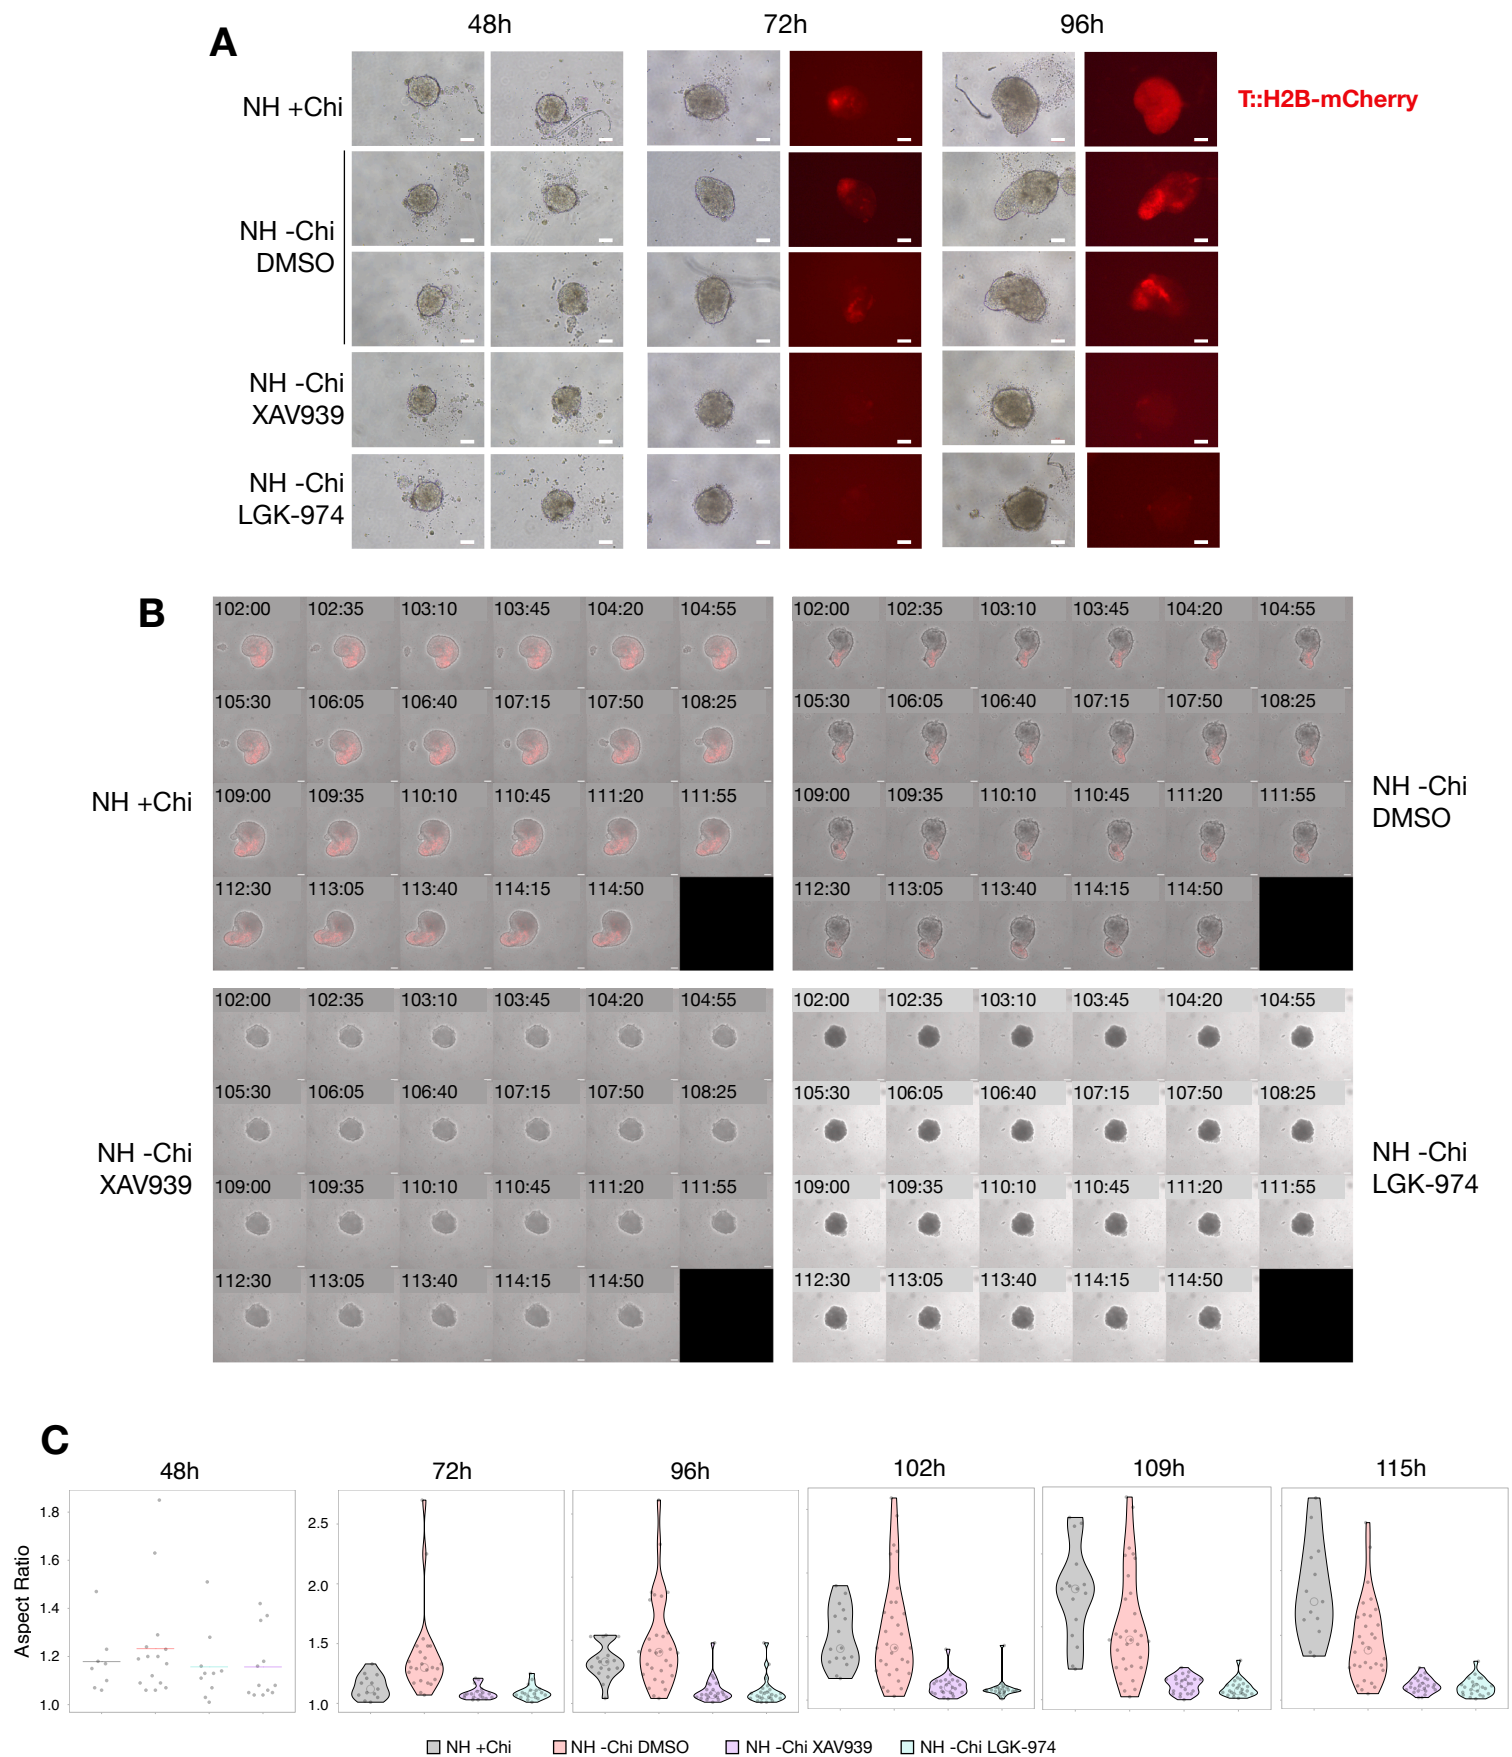

**Fig. S5. Investigation of T expression in response to WNT pathway inhibition in spontaneously elongating gastruloids.**

- A) Expression levels of the T::H2B-mCherry reporter at indicated time points and conditions. Scale bars are 100  $\mu$ m.
- B) Live imaging stills of the T::H2B-mCherry reporter at indicated time points and conditions.
- C) Quantification of elongation in the form of aspect ratios. Each dot is a single structure.



Figure S6

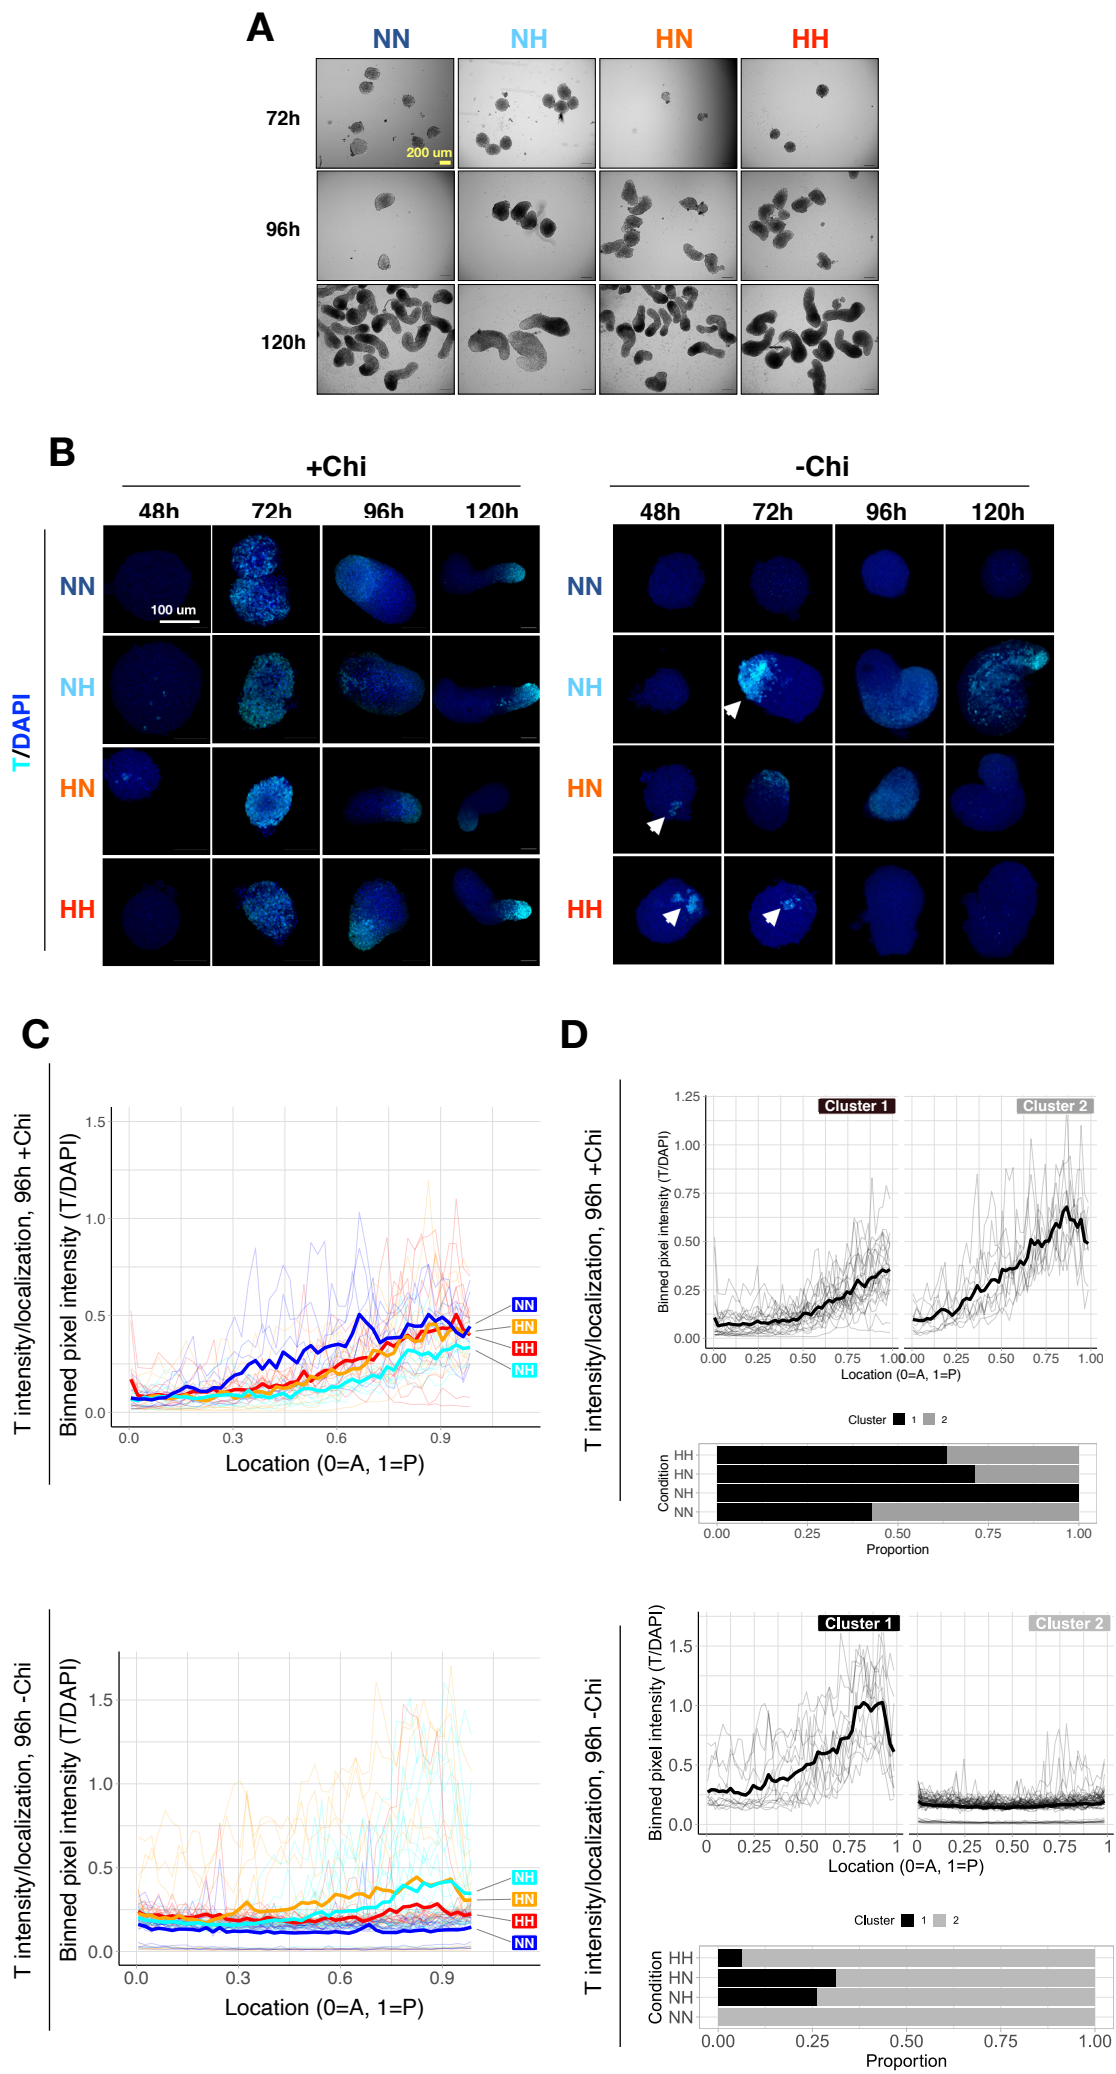

**Fig. S6. Further characterization of T levels in hypoxic +Chi gastruloids exposed to hypoxia.**

- A) Bright-field images of representative gastruloids at the indicated time points.
- B) Fluorescent microscopy images of representative gastruloids at early time points in -Chi and +Chi conditions. Images show a single z-stack. Arrows indicate emergence of T in a subset of cells.
- C) Localization of T signal along the anterior-posterior (A-P) axis of gastruloids in each condition at 96h. T signal was binned at 1% length increments along each structure for plotting and normalized to DAPI signal. Thick lines show the mean and thin lines show data from individual structures.
- D) K-means clustering of 96h +Chi and -Chi structures with n=2 clusters.

Figure S7

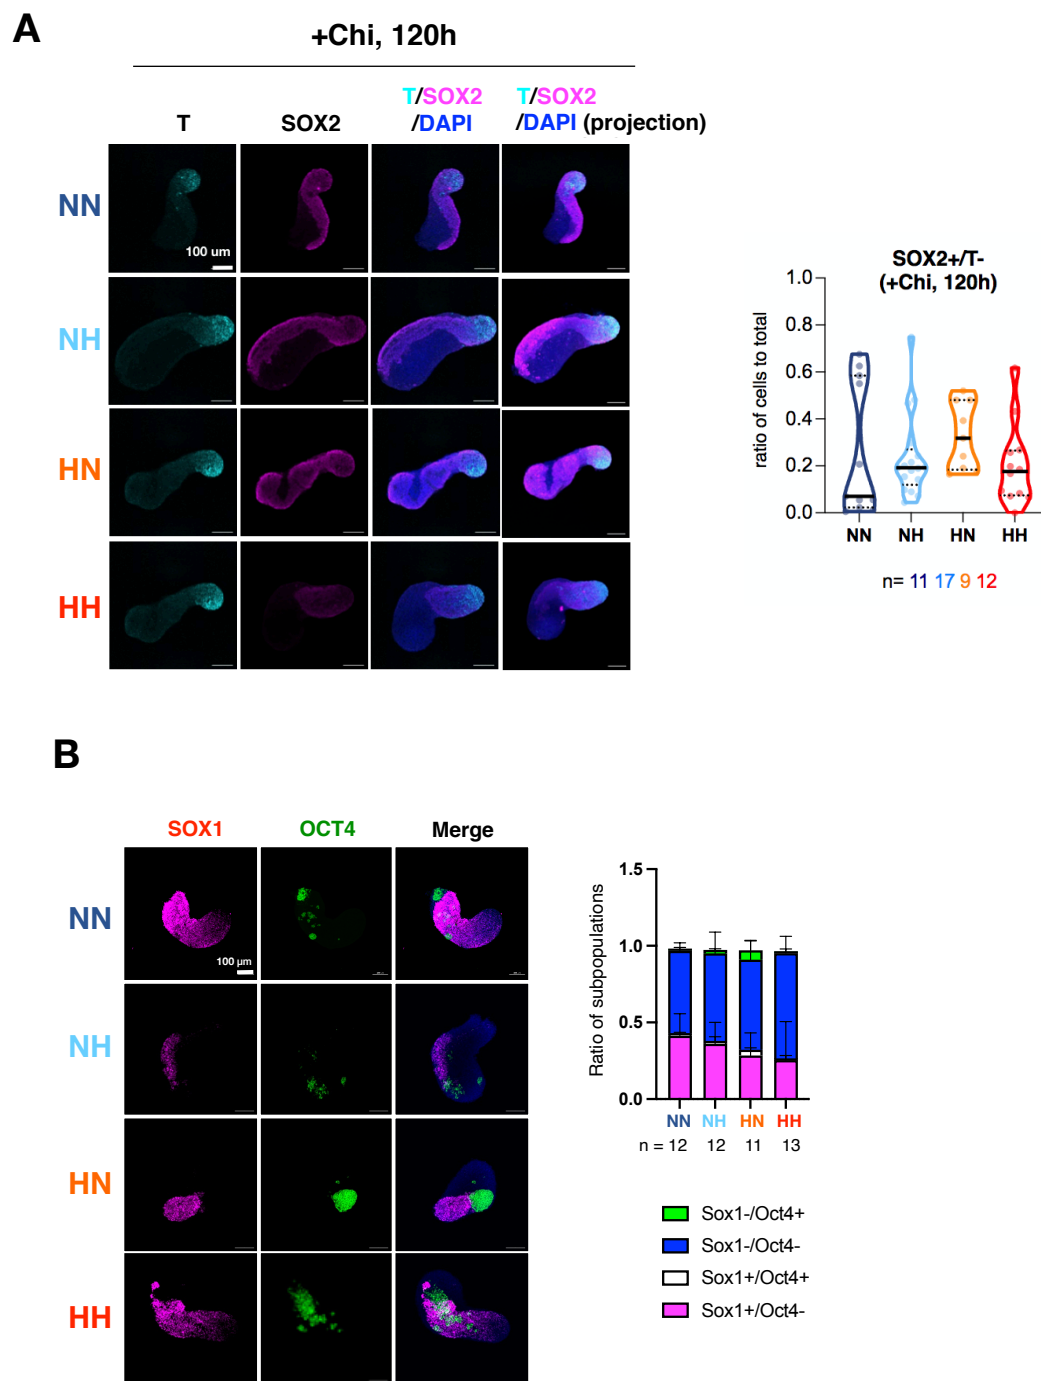

**Fig. S7. Characterization of the neural lineage in hypoxic +Chi gastruloids.** Representative images (left) and quantification (right) of SOX2 (A) and SOX1 and OCT4 (B) staining in +Chi gastruloids at 120h. n indicates the number of analyzed structures.

Figure S8

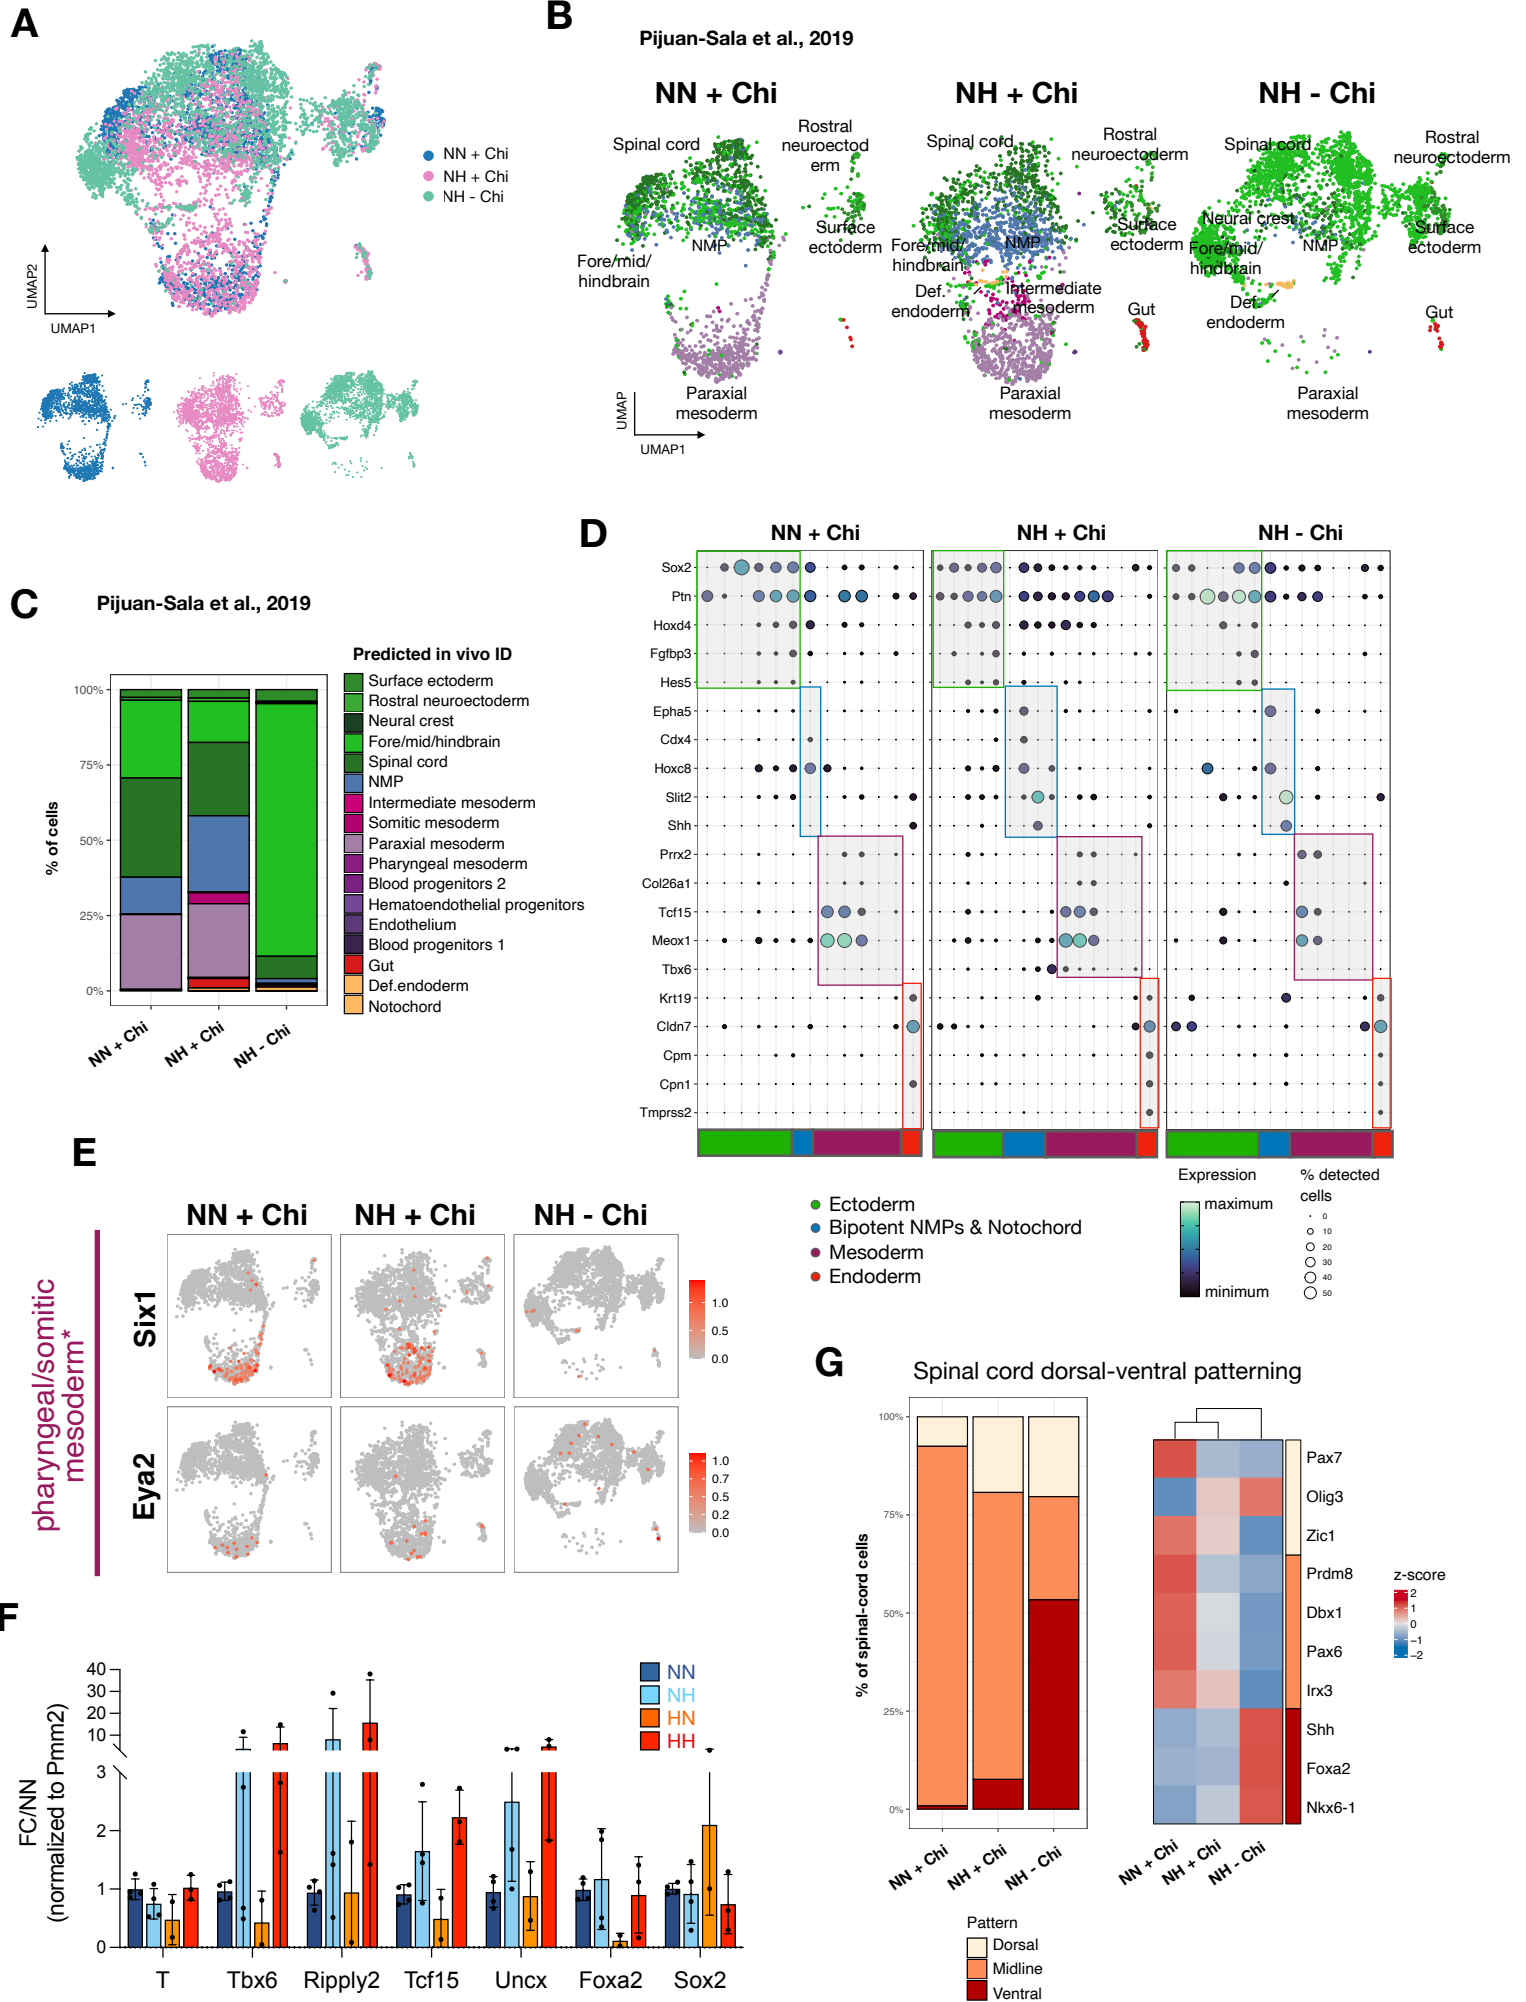

**Fig. S8. Further characterization of scRNA-seq data.**

- A) Integrated gastruloid UMAP coloured by condition (top) and splitted by condition (bottom).
- B) UMAP with Seurat clusters coloured by in vivo predicted ID identified by using reference scRNA-seq atlas from embryonic days E6.5-8.5 (Grosswendt et al., 2020; Pijuan-Sala et al., 2019). See Methods for details. Names of cell states with fewer than 5 cells in a given condition are not listed on the UMAP.
- C) Ratio of cells assigned to the indicated in vivo cell state according to the shown reference atlas.
- D) Expression levels of top marker genes (Grosswendt et al., 2020) characterizing the in vivo indicated cell states aggregated by germ layer origin.
- E) UMAP feature plot coloured by expression of pharyngeal mesoderm marker genes (Grosswendt et al., 2020) at each condition. \*Note: these genes have been shown to be expressed as well in somite cell state in (Grifone et al., 2007).
- F) Relative expression levels of shown genes in gastruloids at 120h. Data represent FC normalized to Pmm2 and standard deviation for 2-4 biological replicates.
- G) Stacked bar plot showing the categorization of spinal cord cells into dorsal-ventral patterning (left), and heatmap showing pseudo-bulk z-score expression values of indicated genes used for the categorization (right).

**Table S1.** Full lists of DE genes in ES, TS, and XEN cells

[Click here to download Table S1](#)

**Table S2.** Full lists of GO terms associated with DE genes in ES, TS, and XEN cells

[Click here to download Table S2](#)

**Table S3.** Proteomic profiles of normoxic and hypoxic (d2 and d7) ESCs

[Click here to download Table S3](#)

**Table S4.** Full list of DE proteins in hypoxic ESCs

[Click here to download Table S4](#)

**Table S5.** Full lists of GO terms associated with DE genes at RNA and/or protein levels

[Click here to download Table S5](#)

**Table S6.** List of HIF1 $\alpha$  target genes at promoters and distal regions

[Click here to download Table S6](#)

**Table S7.** Full lists of GO terms associated with HIF1 $\alpha$  target genes

[Click here to download Table S7](#)

**Table S8.** Full list of HIF1 $\beta/\alpha$ -CATENIN common target promoters and enhancers

[Click here to download Table S8](#)

**Table S9.** Number of gastruloids or structures used for each condition and time point

[Click here to download Table S9](#)

**Table S10.** List of marker genes that we used for neural cell and dorsal-ventral categorizations

[Click here to download Table S10](#)

**Table S11.** Primers and antibodies used in this study

[Click here to download Table S11](#)

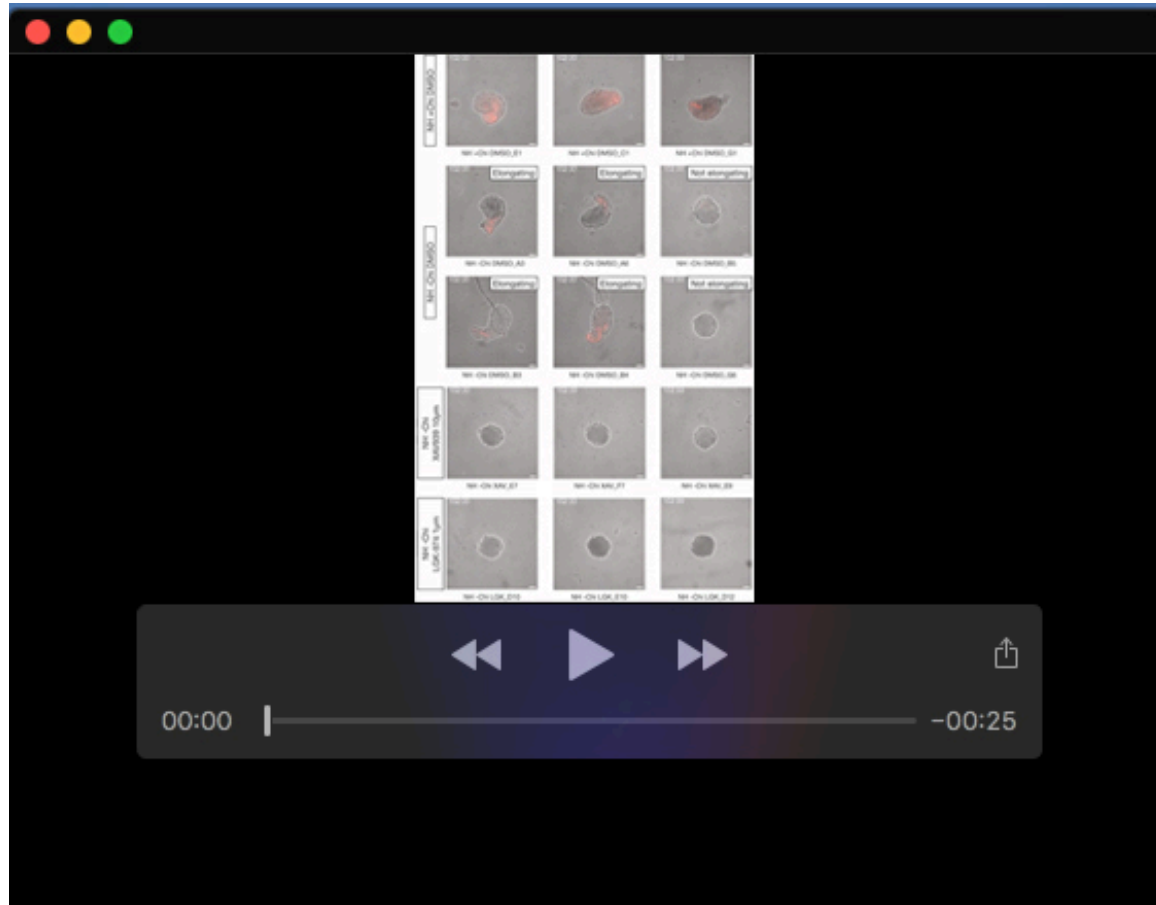

**Movie 1.** Live imaging of NH -Chi and +Chi gastruloids between 102-115h of differentiation. WNT pathway inhibitors XAV939 and LGK974 were used to test the dependence of elongation on WNT pathway activity. Fluorescence signal shows T::H2B-mCherry reporter activity.
